# Supplementary material for: Management practices regulate the response of Moso bamboo foliar stoichiometry to nitrogen deposition
Source: PubMed Central journal article supplement (PMC4823648; doi:10.1038/srep24107), 2016-04-07
Supplement: srep24107-s1.pdf [file srep24107-s1.pdf]

# **Management practices regulate the response of Moso bamboo foliar stoichiometry to nitrogen deposition**

Xinzhang Song<sup>1\*</sup>, Honghao Gu<sup>1</sup>, Meng Wang<sup>2</sup>, Guomo Zhou<sup>1</sup>, Quan Li<sup>1</sup>

<sup>1</sup>*The Nurturing Station for the State Key Laboratory of Subtropical Silviculture, Zhejiang A&F University, Lin'an, 311300, China*

<sup>2</sup>*Laboratory for Ecological Forecasting and Global Change, College of Forestry, Northwest Agriculture and Forest University, Yangling, 712100, China*

\*Corresponding author: Tel: (86) 571-63741816; Fax: (86) 571-63742899

E-mail address: [songxinzhang@gmail.com](mailto:songxinzhang@gmail.com);

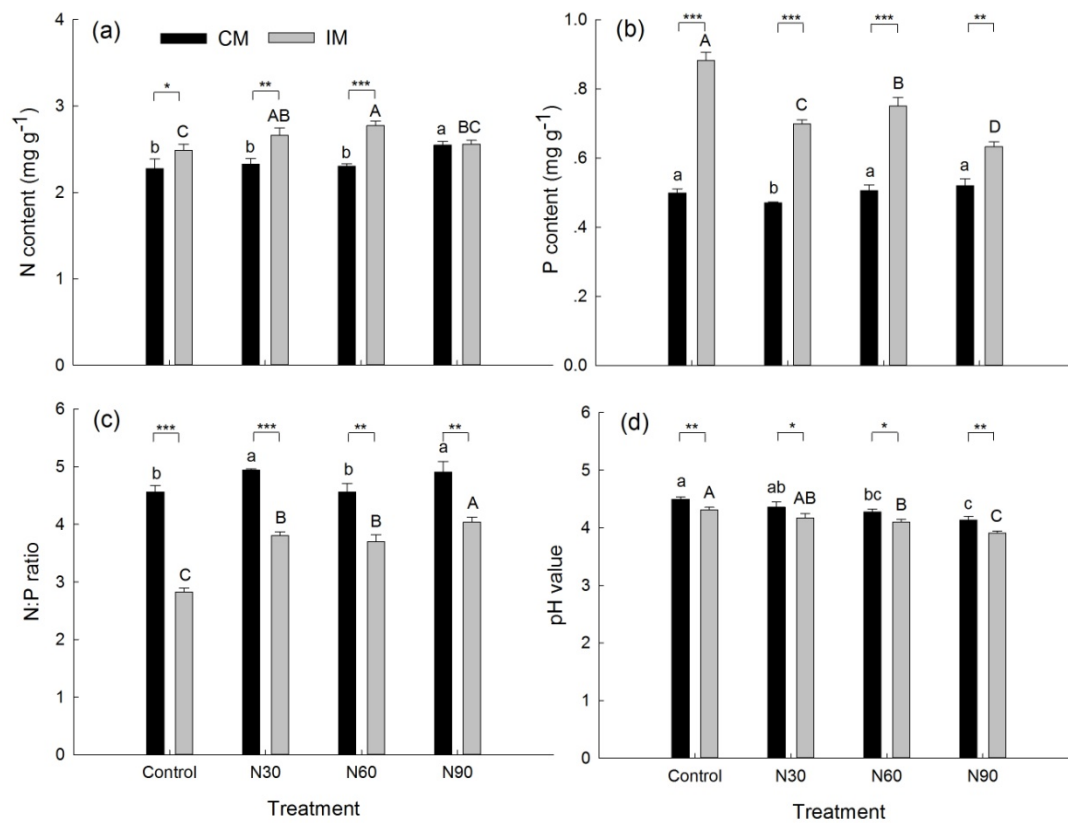

**Figure S1.** Moso bamboo forests soil N (a), P (b) concentrations, N:P ratios and pH values under different management practices (CM: conventional management; IM: intensive management) and N addition treatments (the control; N30: 30 kg N ha<sup>-1</sup>yr<sup>-1</sup>; N60: 60 kg N ha<sup>-1</sup>yr<sup>-1</sup>; N90: 90 kg N ha<sup>-1</sup>yr<sup>-1</sup>) (n=3). Different lowercase letters indicate significant differences among N addition rates under CM treatments ( $P < 0.05$ ). Different capital letters indicate significant differences among N addition rates under IM treatments ( $P < 0.05$ ). Asterisks indicate significant differences between CM and IM at the same N addition rate (\* $P < 0.05$ , \*\* $P < 0.01$ , \*\*\* $P < 0.001$ ).
